# Supplementary material for: Educational interventions to improve prescription and dispensing of antibiotics: a systematic review
Source: PubMed Central journal article supplement (PMC4302109; doi:10.1186/1471-2458-14-1276), 2014-12-15

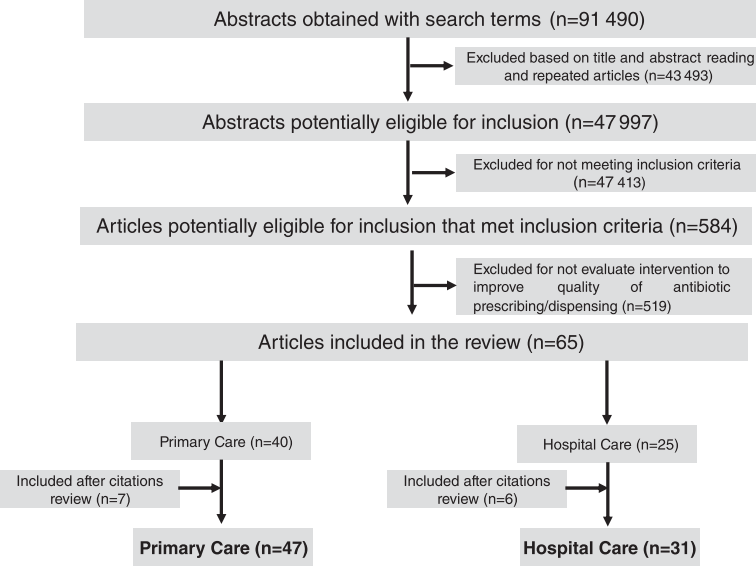

Supplement: 12889_2014_7383_MOESM1_ESM.pdf [file 12889_2014_7383_MOESM1_ESM.pdf]
